# Supplementary material
Source: MDPI journal article supplement (https://www.mdpi.com/1424-2818/13/9/450)
Supplement: s1 [file s1]

## Supplementary Material

### Supplementary Table S1. Density of recruited *Trapezia* crabs.

Changes in the density of recruited *Trapezia* crabs in each of the experimental coral fragments throughout the monitoring (indicated with the initial T) in the different study areas. Restoration Zone (ZR), Pavonas Platform (PP), and Cueva del Muerto (CM).

| Zone            | ID   | Monitoring Time |    |    |    |    |    |    |    |    |    |     |     |     |
|-----------------|------|-----------------|----|----|----|----|----|----|----|----|----|-----|-----|-----|
|                 |      | T0              | T1 | T2 | T3 | T4 | T5 | T6 | T7 | T8 | T9 | T10 | T11 | T12 |
| Recruit density |      |                 |    |    |    |    |    |    |    |    |    |     |     |     |
| ZR              | H-01 | 0               | 0  | 0  | 0  | 0  | 1  | 1  | 1  | 2  | 2  | 2   | 2   | 5   |
| ZR              | H-03 | 0               | 1  | 0  | 0  | 0  | 0  | 1  | 1  | 1  | 1  | 2   | 4   | 7   |
| ZR              | H-04 | 0               | 0  | 0  | 1  | 0  | 1  | 2  | 1  | 2  | 2  | 2   | 2   | 4   |
| ZR              | H-05 | 0               | 0  | 0  | 2  | 1  | 1  | 0  | 3  | 3  | 2  | 2   | 2   | 3   |
| ZR              | H-07 | 0               | 0  | 0  | 1  | 1  | 1  | 2  | 2  | 4  | 3  | 3   | 3   | 3   |
| ZR              | H-08 | 0               | 0  | 0  | 0  | 1  | 1  | 1  | 2  | 2  | 2  | 3   | 2   | 4   |
| ZR              | H-09 | 0               | 0  | 0  | 1  | 1  | 0  | 0  | 2  | 2  | 3  | 2   | 1   | 1   |
| ZR              | H-10 | 0               | 0  | 0  | 1  | 0  | 0  | 1  | 2  | 2  | 2  | 2   | 2   | 5   |
| ZR              | H-12 | 0               | 0  | 0  | 0  | 0  | 1  | 2  | 2  | 2  | 3  | 3   | 3   | 2   |
| ZR              | H-13 | 0               | 0  | 0  | 0  | 0  | 1  | 0  | 0  | 1  | 2  | 3   | 3   | 2   |
| ZR              | H-14 | 0               | 0  | 0  | 0  | 1  | 1  | 1  | 1  | 2  | 2  | 2   | 2   | 3   |
| ZR              | H-15 | 0               | 1  | 0  | 1  | 1  | 0  | 1  | 0  | 1  | 2  | 3   | 3   | 2   |
| ZR              | H-16 | 0               | 0  | 0  | 1  | 1  | 0  | 1  | 2  | 3  | 2  | 2   | 2   | 3   |
| ZR              | H-18 | 0               | 0  | 0  | 1  | 0  | 1  | 1  | 1  | 2  | 2  | 3   | 2   | 4   |
| PP              | H-21 | 0               | 0  | 0  | 0  | 0  | 0  | 1  | 2  | 2  | 2  | 2   | 3   | 4   |
| PP              | H-22 | 0               | 0  | 1  | 0  | 0  | 1  | 2  | 1  | 3  | 2  | 3   | 3   | 5   |
| PP              | H-24 | 0               | 0  | 0  | 0  | 0  | 2  | 1  | 1  | 1  | 1  | 2   | 1   | 3   |
| PP              | H-25 | 0               | 0  | 0  | 1  | 1  | 1  | 1  | 1  | 2  | 2  | 4   | 3   | 4   |
| PP              | H-26 | 0               | 0  | 0  | 0  | 0  | 0  | 1  | 1  | 3  | 2  | 1   | 3   | 3   |
| PP              | H-27 | 0               | 1  | 1  | 1  | 0  | 1  | 2  | 2  | 4  | 1  | 1   | 2   | 5   |
| PP              | H-28 | 0               | 0  | 0  | 0  | 0  | 0  | 1  | 2  | 2  | 4  | 3   | 2   | 3   |
| PP              | H-29 | 0               | 0  | 0  | 1  | 0  | 0  | 0  | 1  | 2  | 2  | 1   | 3   | 3   |
| PP              | H-30 | 0               | 0  | 0  | 1  | 0  | 0  | 1  | 2  | 0  | 3  | 1   | 5   | 2   |
| PP              | H-31 | 0               | 1  | 0  | 0  | 0  | 0  | 1  | 2  | 3  | 2  | 2   | 3   | 3   |
| PP              | H-32 | 0               | 0  | 0  | 0  | 1  | 1  | 1  | 3  | 2  | 2  | 1   | 3   | 4   |
| PP              | H-33 | 0               | 0  | 0  | 0  | 0  | 1  | 1  | 1  | 0  | 3  | 3   | 3   | 4   |
| PP              | H-34 | 0               | 0  | 0  | 0  | 0  | 1  | 2  | 2  | 3  | 3  | 3   | 3   | 7   |
| PP              | H-35 | 0               | 1  | 1  | 0  | 1  | 0  | 3  | 1  | 2  | 3  | 2   | 3   | 4   |
| PP              | H-36 | 0               | 1  | 0  | 0  | 0  | 1  | 2  | 3  | 2  | 2  | 2   | 3   | 5   |
| PP              | H-37 | 0               | 0  | 0  | 1  | 1  | 0  | 1  | 1  | 1  | 3  | 1   | 3   | 4   |
| PP              | H-40 | 0               | 1  | 1  | 0  | 0  | 1  | 1  | 2  | 2  | 2  | 1   | 3   | 5   |
| CM              | H-44 | 0               | 0  | 1  | 0  | 0  | 0  | 0  | 1  | 3  | 3  | 3   | 3   | 4   |

---

|    |      |   |   |   |   |   |   |   |   |   |   |   |   |   |
|----|------|---|---|---|---|---|---|---|---|---|---|---|---|---|
| CM | H-46 | 0 | 0 | 0 | 0 | 0 | 1 | 1 | 2 | 2 | 2 | 4 | 3 | 4 |
| CM | H-47 | 0 | 0 | 1 | 1 | 0 | 1 | 2 | 1 | 2 | 2 | 3 | 4 | 6 |
| CM | H-50 | 0 | 0 | 0 | 1 | 0 | 1 | 0 | 1 | 0 | 1 | 2 | 3 | 2 |
| CM | H-51 | 0 | 0 | 0 | 0 | 0 | 1 | 1 | 2 | 2 | 2 | 3 | 2 | 4 |
| CM | H-52 | 0 | 0 | 1 | 0 | 0 | 1 | 1 | 0 | 1 | 1 | 1 | 3 | 2 |
| CM | H-53 | 0 | 0 | 0 | 1 | 0 | 0 | 1 | 2 | 2 | 2 | 2 | 3 | 3 |
| CM | H-54 | 0 | 0 | 1 | 1 | 0 | 0 | 0 | 0 | 1 | 1 | 1 | 1 | 4 |
| CM | H-56 | 0 | 0 | 0 | 0 | 0 | 0 | 0 | 0 | 1 | 1 | 0 | 2 | 2 |
| CM | H-57 | 0 | 0 | 0 | 0 | 0 | 1 | 0 | 1 | 1 | 1 | 3 | 3 | 3 |
| CM | H-58 | 0 | 0 | 0 | 0 | 0 | 0 | 2 | 3 | 3 | 4 | 2 | 2 | 4 |
| CM | H-59 | 0 | 0 | 1 | 1 | 1 | 1 | 0 | 1 | 3 | 2 | 2 | 2 | 4 |
| CM | H-60 | 0 | 0 | 0 | 1 | 0 | 1 | 1 | 1 | 2 | 3 | 1 | 3 | 4 |

---
